# Supplementary material
Source: MDPI journal article supplement (https://www.mdpi.com/2073-445X/10/7/667)
Supplement: s1 [file s1]

Article

# An overview of the geomorphological characteristics of the Pergamon Micro-Region (Bakırçay and Madra River catchments, Aegean Region, West Turkey)

Xun Yang <sup>1,\*</sup>, Fabian Becker <sup>1</sup>, Daniel Knitter <sup>2</sup> and Brigitta Schütt <sup>1</sup>

<sup>1</sup> Physical Geography, Institute of Geographical Sciences, Freie Universität Berlin, Malteserstraße 74-100, 12449 Berlin, Germany; [xun.yang@fu-berlin.de](mailto:xun.yang@fu-berlin.de) (X.Y.); [fabian.becker@fu-berlin.de](mailto:fabian.becker@fu-berlin.de) (F.B.); [Brigitta.Schuett@fu-berlin.de](mailto:Brigitta.Schuett@fu-berlin.de) (B.S.)

<sup>2</sup> Physical Geography, Department of Geography, Christian-Albrechts-Universität zu Kiel, Ludewig-Meyn-Straße 14, 24118 Kiel, Germany; [knitter@geographie.uni-kiel.de](mailto:knitter@geographie.uni-kiel.de) (D.K.)

\* Correspondence: [xun.yang@fu-berlin.de](mailto:xun.yang@fu-berlin.de) (X.Y.)

Received: date; Accepted: date; Published: date

## Supplementary Materials

**Table S1.** The definition and classification rules of landform units for the geomorphological map (modified from [1])

| Landform unit* <sup>1</sup>     | Definition                                                                                                                                        | Classification rules based on different sources* <sup>2</sup>                                                                                                                                                                                  |
|---------------------------------|---------------------------------------------------------------------------------------------------------------------------------------------------|------------------------------------------------------------------------------------------------------------------------------------------------------------------------------------------------------------------------------------------------|
| <b>UPLAND</b>                   |                                                                                                                                                   |                                                                                                                                                                                                                                                |
| Ridge                           | The chain of hills; generally higher than the surrounding slopes from certain distance                                                            | Merged by the geomorphons classes <i>summit</i> and <i>ridge</i> (Dg).                                                                                                                                                                         |
| Slope with debris cover         | The slope areas covered by vegetation and debris                                                                                                  | Merged by the geomorphons classes <i>shoulder</i> , <i>spur</i> and <i>slope</i> (Dg); slope with bare rock (see below) was excluded.                                                                                                          |
| Slope with bare rock            | Bare solid bedrock exposed on the mountainous surface; vegetation, soil and sediment covers are sparse or lacking                                 | Bright color in the satellite imagery; no obvious vegetation cover (GE).                                                                                                                                                                       |
| Valley without fluvial deposits | Intramountainous valleys without infill fluvial deposits                                                                                          | First, geomorphons classes <i>hollow</i> , <i>footslope</i> , <i>valley</i> and <i>depression</i> in the mountains were merged into valley; then, valley without fluvial deposits was extracted by subtracting the fluvial infill valley (Dg). |
| Valley with fluvial deposits    | Intramountainous valleys filled with fluvial deposits                                                                                             | F; valley cross profiles show a saucer shape (De); often used as an arable land (GE).                                                                                                                                                          |
| <b>LOWLAND</b>                  |                                                                                                                                                   |                                                                                                                                                                                                                                                |
| Colluvial zone                  | Connecting area between the elevated mountain and the plain; generally covered by loose, unconsolidated colluvial sediments and alluvial fans [2] | Elevation decreases from the elevated area to plain (Ds); L2 and L3.                                                                                                                                                                           |
| Alluvial plain                  | Largely flat terrain adjacent to main river                                                                                                       | Generally flat (Ds); often used as irrigated arable land (GE).                                                                                                                                                                                 |
| Littoral plain                  | The flat–gently inclined area adjacent to the Aegean Sea and covered by intercalated terrestrial, littoral and marine deposits                    | Generally flat (De); often used as an irrigated land or other agricultural areas (GE); L3.                                                                                                                                                     |
| Delta                           | The area formed at the river mouth to the sea and filled within fluvio–littoral sediments                                                         | Delta-shaped (GE); L3 and L4.                                                                                                                                                                                                                  |

|                           |                                                                                                                      |                                                                                                                                                                                                                                      |
|---------------------------|----------------------------------------------------------------------------------------------------------------------|--------------------------------------------------------------------------------------------------------------------------------------------------------------------------------------------------------------------------------------|
| Alluvial fan              | Fan-shaped body, deposited by avulsive channels which emerge from a mountainous catchment to an adjoining valley [3] | Fan shape, elevation decreases from fan apex to toe (De, Dh, Ds, GE); L2.                                                                                                                                                            |
| Perennial stream          | Natural watercourse                                                                                                  | L1.                                                                                                                                                                                                                                  |
| Intermittent stream       | Natural watercourse; always ceases to flow in dry periods                                                            | L1.                                                                                                                                                                                                                                  |
| Paleochannel              | Abandoned river channel                                                                                              | Curved structure on the plain and separated from the main river (Dh); usually holds water (GE).                                                                                                                                      |
| Assumed paleochannel      | Older abandoned river channel or oxbow                                                                               | Curved structure (Dh) with 1–2 m elevation difference to the adjacent plain (De); water is not visible at least during dry seasons, and color in the satellite imageries shows different tone (darker) to the adjacent area (GE); F. |
| <b>ANTHROPOGENIC</b>      |                                                                                                                      |                                                                                                                                                                                                                                      |
| Reservoir                 | Water body closed by dam within the intramountainous valley                                                          | CLC; dark (blue) and broadened water surface (GE); sometimes bright-colored sediments when low water stands (GE).                                                                                                                    |
| Mining area               | Surface mine or quarry, including those currently in use and abandoned ones                                          | CLC; bright-colored bare surface with artificial terrain (GE).                                                                                                                                                                       |
| Agricultural terrace area | Area with artificial terraces                                                                                        | Continuous or discontinuous lines with intervals between 1 and 20 m (sometimes up to 50 m), always developed along contour lines (GE); F.                                                                                            |
| Irrigation/drainage canal | Artificial watercourse for irrigation or drainage of the cultivated land                                             | Dark, straight line on the plain (GE); F.                                                                                                                                                                                            |

\*1 Other features, e.g., small water bodies, settlements and roads, were merged into their nearest classification.

\*2 GE: Google Earth (last accessed 8 June 2020); D: TanDEM-X (e: elevation; h: hillshade; s: slope; g: geomorphons); CLC: Corine Land Cover 2018 [4]; F: field observation; L: literature (1: [5–8]; 2: [9–12]; 3: [13]; 4: [14]). The order shows the priority of different sources.

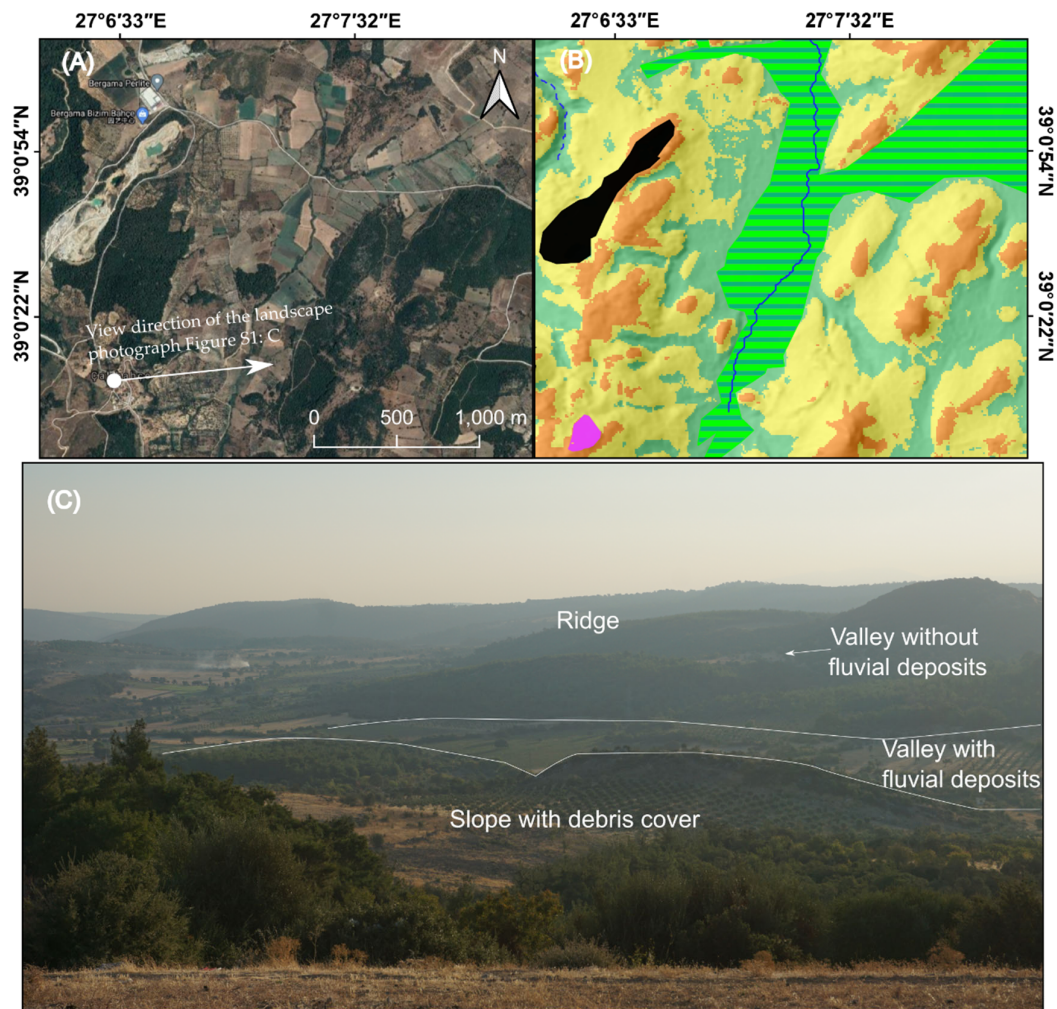

**Figure S1.** Çalıbahçe basin, indicating how we use the satellite images and geomorphons to generate the geomorphological map (ridge, valley without fluvial deposits, valley with fluvial deposits and slope with debris cover) and the validation in the field. (A) Data: Google Earth satellite images (WorldView-2, last accessed 8 June 2020). (B) Geomorphological map (legend refers to Figure 4, same below). (C) Landscape photograph.

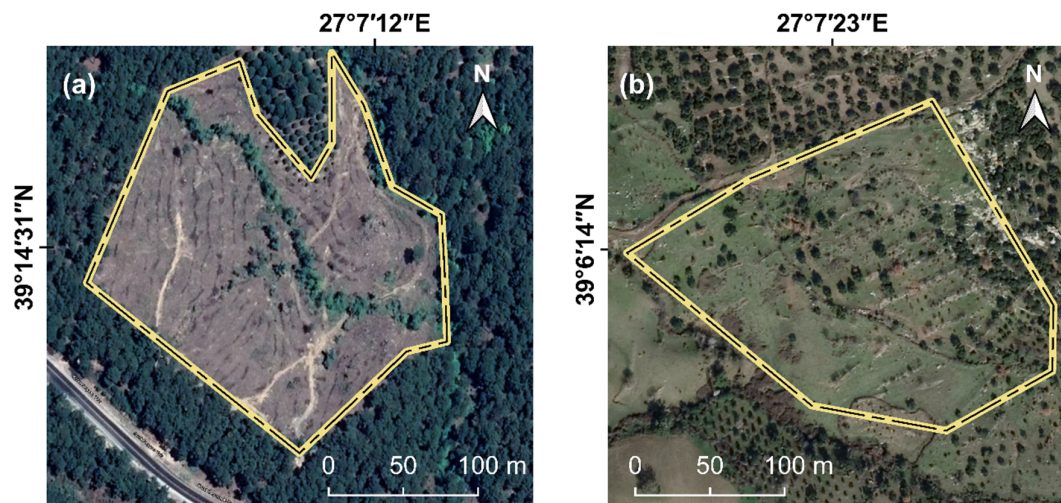



**Figure S2.** Terrace examples: continuous (a) and discontinuous (b). Data: Google Earth satellite images (WorldView-2, last accessed 8 June 2020).

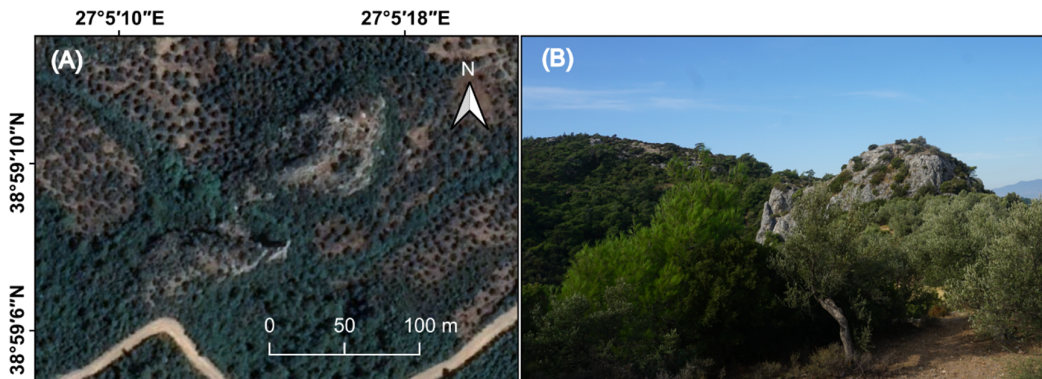

**Figure S3.** Slope with bare rock in Tekkedere valley. (A) Data: Google Earth satellite images (WorldView-2, last accessed 8 June 2020). (B) Landscape photograph.

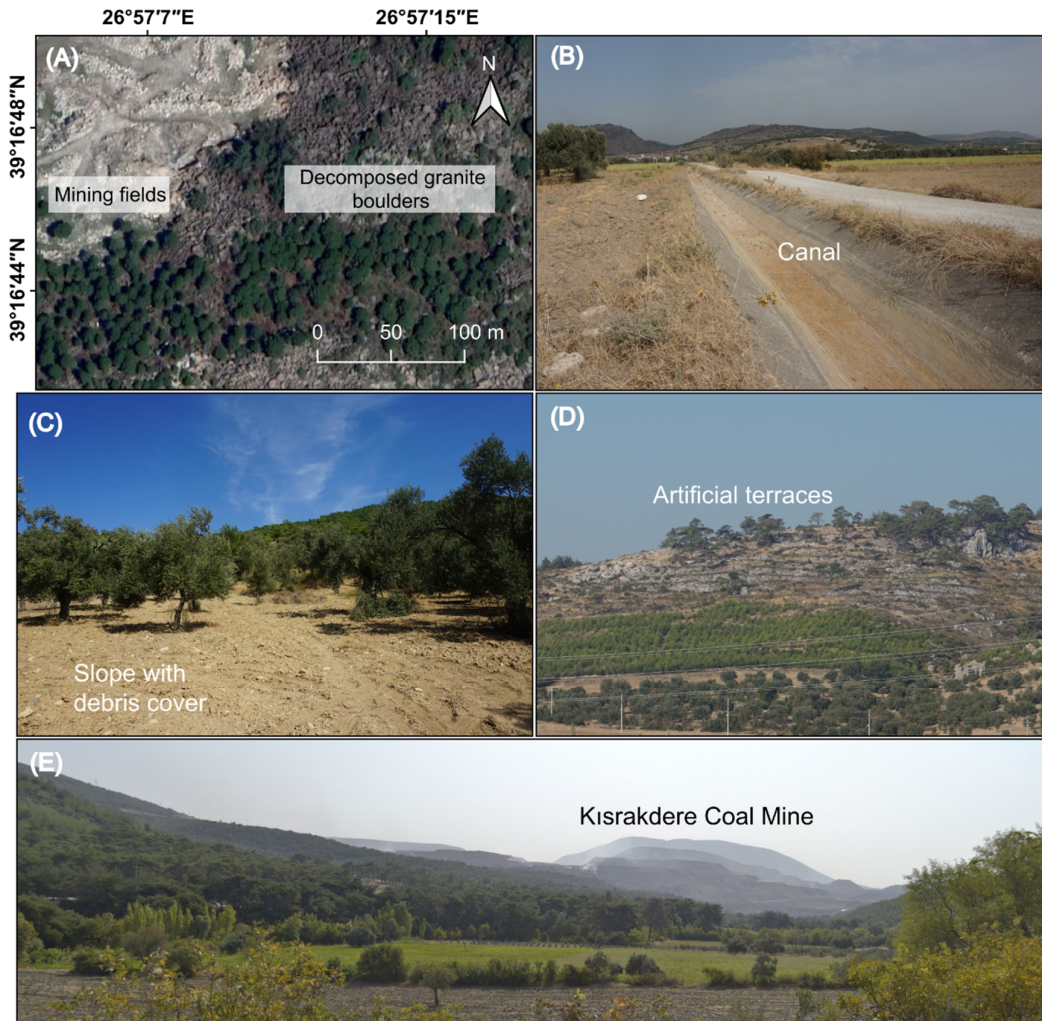

**Figure S4.** (A) An example of mining fields and decomposed granite boulders at the northwestern slopes of the Kozak interior plain (subunit 2.1). Data: Google Earth satellite images (WorldView-2, last accessed 8 June 2020). Photographs of a canal on the Bergama Fan (B), slope with debris cover in the Tekkedere valley (C), artificial terraces in Çalibahçe basin (D), Kısırkdere Coal Mine (E).

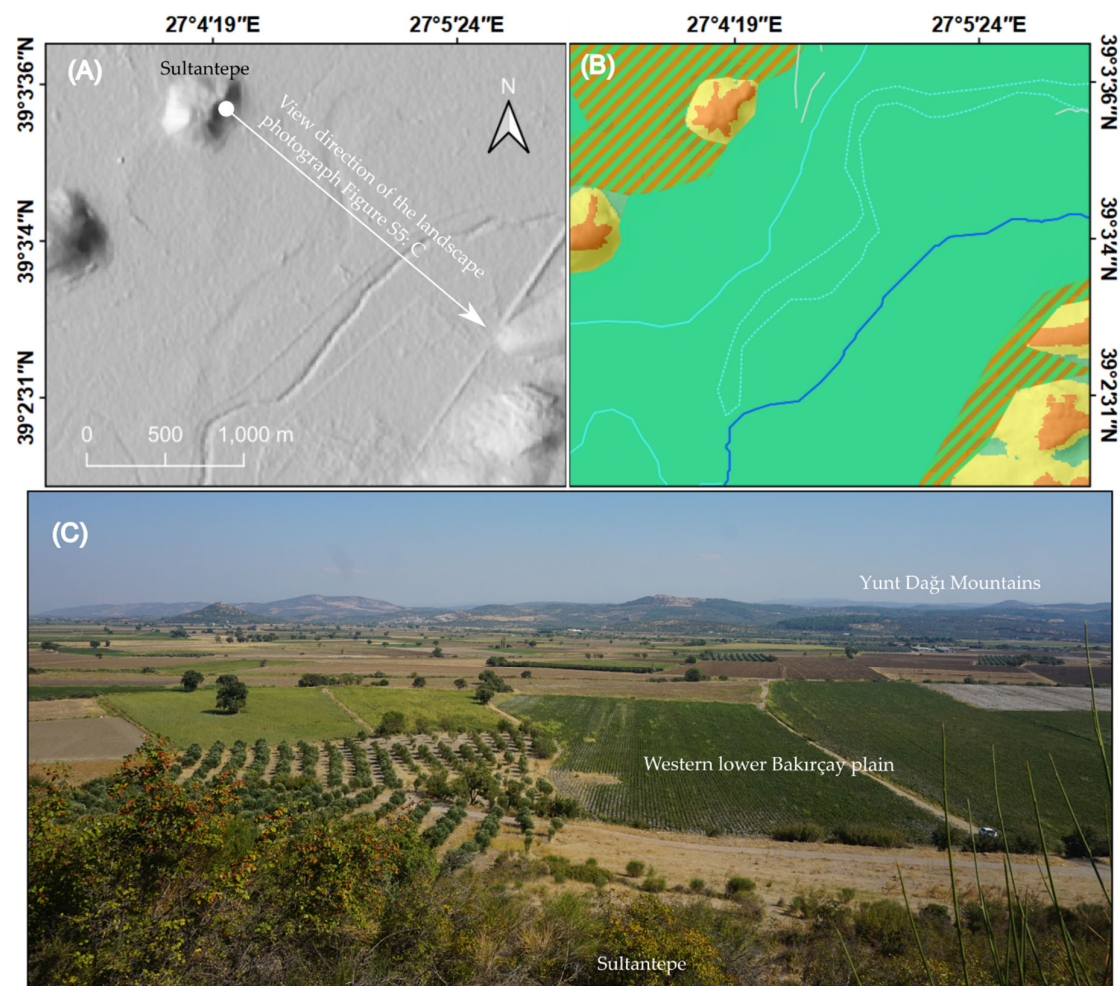

**Figure S5.** The western lower Bakırçay plain from the Sultantepe to the Yunt Dağı Mountains. (A) The hillshade of TanDEM-X data, indicating the features of alluvial plain and paleochannels which are highlighted in Figure S5: B. (B) Geomorphological map. (C) Landscape photograph.



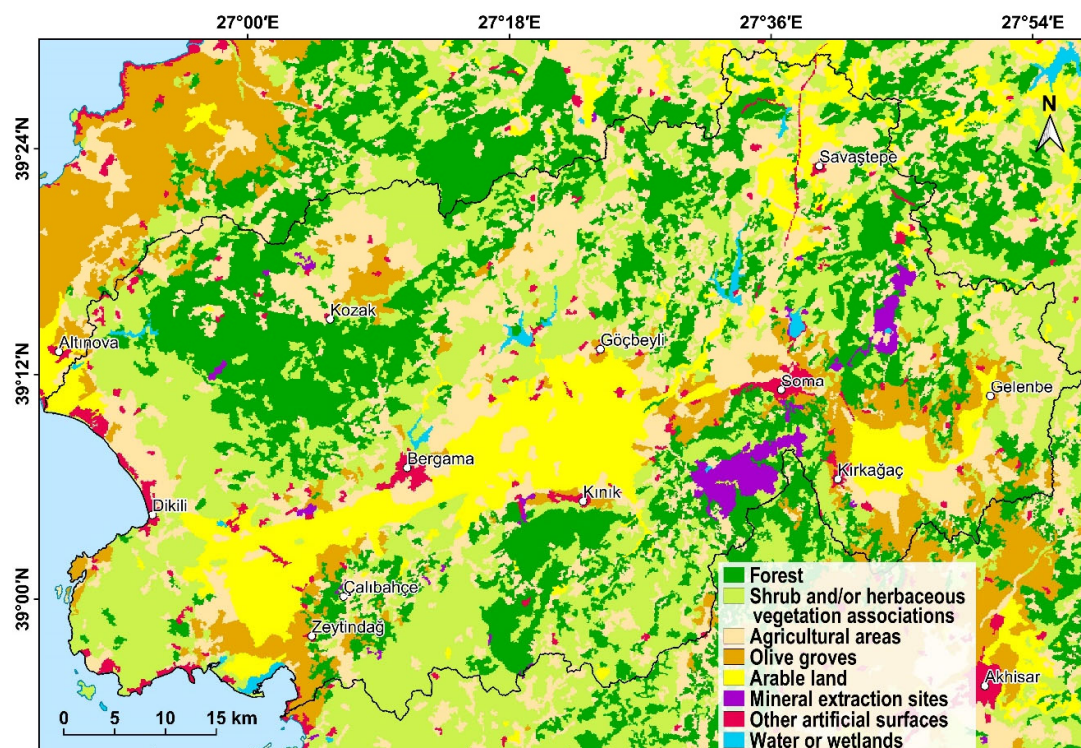

**Figure S6.** The land cover map of the Bakırçay and Madra River catchments and the adjacent coastal areas. Data: Corine Land Cover (CLC) 2018 (Version 2020\_20u1) [4].



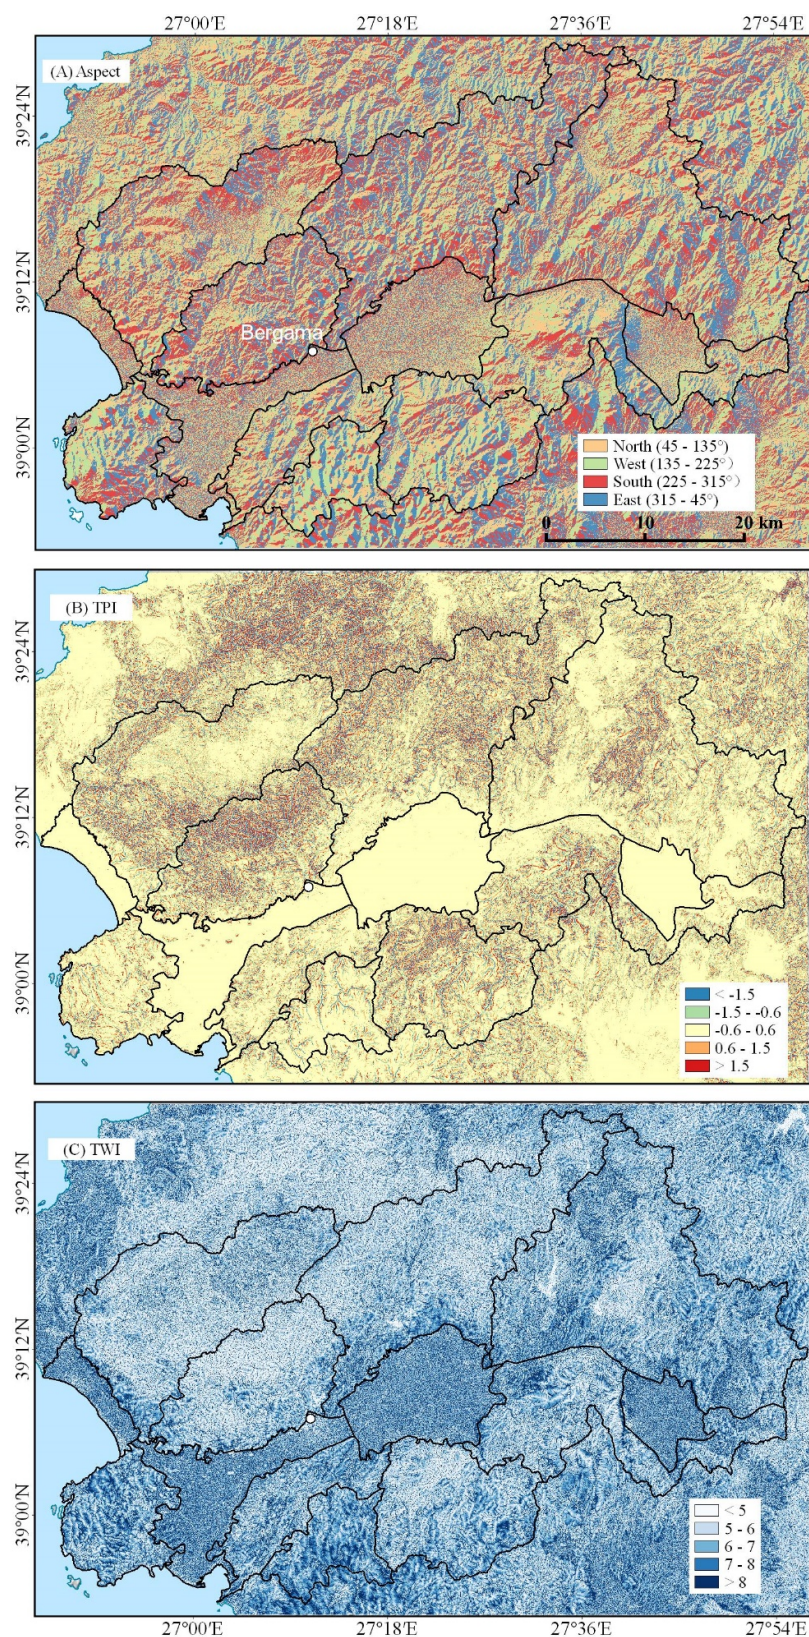

**Figure S7.** Additional geomorphometric parameter maps derived from TanDEM-X data. (A) Aspect. (B) Topographic Position Index (TPI). (C) Topographic Wetness Index (TWI).

## References

1. Walstra, J.; Heyvaert, V.; Verkinderen, P. Remote sensing for the study of fluvial landscapes in Lower Khuzestan, SW Iran. In *Developments in Earth Surface Processes*, Elsevier: Leicester, United Kingdom, 2009; Volume 15.
2. Goudie, A. Encyclopedia of Geomorphology. In *Encyclopedia of Geomorphology*, Goudie, A., Ed.; Routledge: London, United Kingdom, 2004; Volume 1, pp. 272–276.
3. Blair, T.C.; McPherson, J.G. Processes and Forms of Alluvial Fans. In *Geomorphology of Desert Environments*, 2nd ed.; Parsons, A.J., Abrahams, A.D., Eds.; Springer: Dordrecht, Netherlands, 2009; pp. 413–467.
4. Cole, B.; Smith, G.; Balzter, H. Acceleration and fragmentation of CORINE land cover changes in the United Kingdom from 2006–2012 detected by Copernicus IMAGE2012 satellite data. *International Journal of Applied Earth Observation and Geoinformation* **2018**, *73*, 107–122.
5. Emre, Ö.; Doğan, A. 1:250,000 Scale Active Fault Map Series of Turkey, Ayvalık (NJ 35-2) Quadrangle. Serial number: 2. General Directorate of Mineral Research and Exploration: Ankara, Turkey, 2010.
6. Emre, Ö.; Doğan, A.; Özalp, S. 1:250,000 Scale Active Fault Map Series of Turkey, Balıkesir (NJ 35-3) Quadrangle. Serial number: 4. General Directorate of Mineral Research and Exploration: Ankara, Turkey, 2011.
7. Emre, Ö.; Özalp, S. 1:250,000 Scale Active Fault Map Series of Turkey, Urla (NJ 35-6) Quadrangle. Serial number: 5. General Directorate of Mineral Research and Exploration: Ankara, Turkey, 2011.
8. Emre, Ö.; Özalp, S.; Duman, T.Y. 1:250,000 Scale Active Fault Map Series of Turkey, İzmir (NJ 35-7) Quadrangle. Serial number: 6. General Directorate of Mineral Research and Exploration: Ankara, Turkey, 2011.
9. Schneider, S.; Matthaei, A.; Bebermeier, W.; Schütt, B. Late Holocene human–environmental interactions in the Eastern Mediterranean: Settlement history and paleogeography of an ancient Aegean hill-top settlement. *Quaternary International* **2014**, *324*, 84–98.
10. Schneider, S.; Matthaei, A.; Schlöffel, M.; Meyer, C.; Kronwald, M.; Pint, A.; Schütt, B. A geoarchaeological case study in the chora of Pergamon, western Turkey, to reconstruct the late Holocene landscape development and settlement history. *Quaternary International* **2015**, *367*, 62–76.
11. Schneider, S.; Nykamp, M.; Matthaei, A.; Bebermeier, W.; Schütt, B. Alluvial geoarchaeology of a small drainage basin in western Anatolia: Late Holocene landscape development and the question of the mouth of the Paleo-Bakırçay. *Quaternary International* **2013**, *312*, 84–95.
12. Schneider, S.; Schlöffel, M.; Schwall, C.; Horejs, B.; Schütt, B. First stratigraphic evidence and absolute dating of a Bronze Age settlement in the



- Bakırçay valley in western Turkey. *Journal of Archaeological Science: Reports* **2017**, *12*, 316–322.
13. Lambrianides, K.; Spencer, N. *The Madra River Delta: Regional Studies on the Aegean Coast of Turkey 1: Environment, Society and Community from Prehistory to the Present*; The British Institute at Ankara: London, United Kingdom, 2007; Volume 35.
  14. Seeliger, M.; Pint, A.; Feuser, S.; Riedesel, S.; Marriner, N.; Frenzel, P.; Pirson, F.; Bolten, A.; Brückner, H. Elaia, Pergamon's maritime satellite: the rise and fall of an ancient harbour city shaped by shoreline migration. *Journal of Quaternary Science* **2019**, *34*, 228–244.
